# Supplementary material
Source: PubMed Central journal article supplement (PMC6520468)
Supplement: mmc1.pdf [file mmc1.pdf]

## **Supplemental Information**

### **EZH2 Inhibition in Ewing Sarcoma**

#### **Upregulates G<sub>D2</sub> Expression for Targeting**

#### **with Gene-Modified T Cells**

**Sareetha Kailayangiri, Bianca Altvater, Stefanie Lesch, Sebastian Balbach, Claudia Göttlich, Johanna Kühnemundt, Jan-Henrik Mikesch, Sonja Schelhaas, Silke Jamitzky, Jutta Meltzer, Nicole Farwick, Lea Greune, Maike Fluegge, Kornelius Kerl, Holger N. Lode, Nikolai Siebert, Ingo Müller, Heike Walles, Wolfgang Hartmann, and Claudia Rossig**

## Supplemental Information

### Supplemental Figure 1.

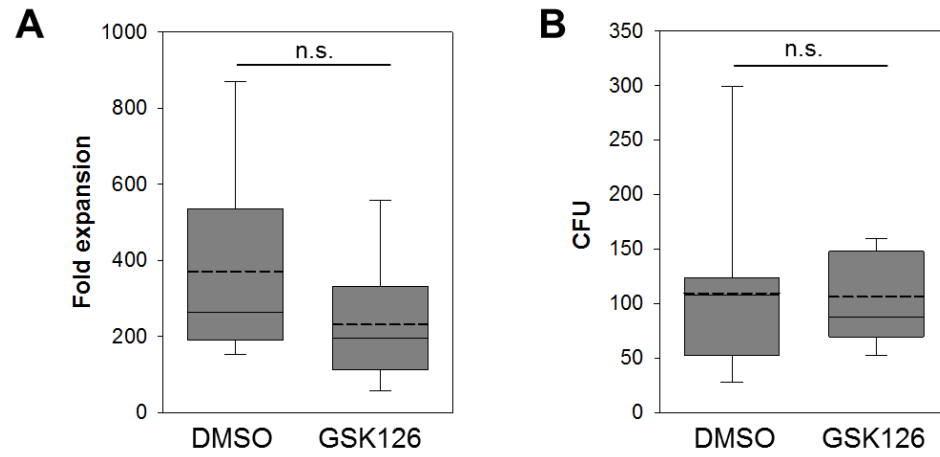

### Supplemental Figure 2.

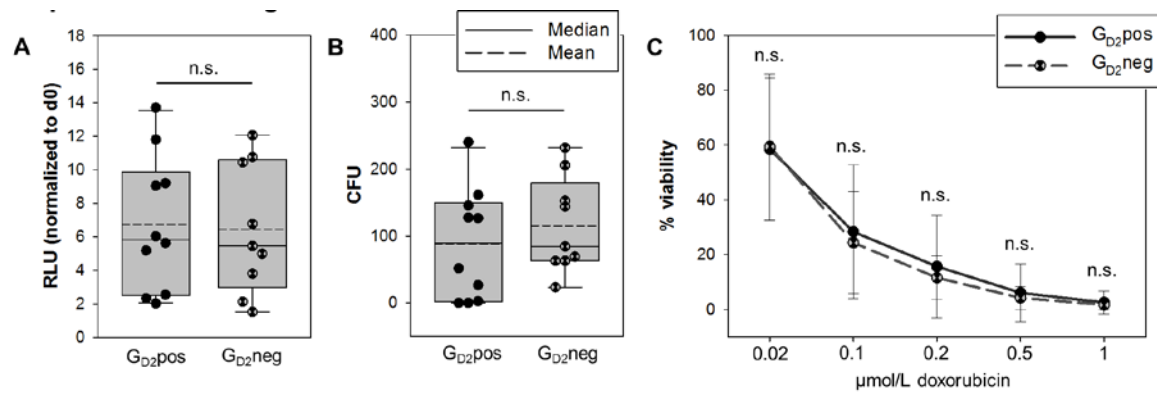

## FIGURE LEGENDS

**Supplemental Figure 1. *In vitro* expansion and colony formation of G<sub>D2</sub>neg EwS cells cultured in the presence of GSK126.** A. *In vitro* expansion rates of 9 G<sub>D2</sub>neg EwS cell lines cultured in the presence of 4 μM GSK126 or equivalent volumes of DMSO (control) for 14 days determined by trypan blue exclusion and cell counting. B. Colony formation of tumor cells cultured in semisolid medium in the presence of 4 μM GSK126 or equivalent volumes of DMSO (control) for 14 days. Statistical analysis for both assays was done by t-test.

**Supplemental Figure 2. Proliferation, colony formation and viability of tumor cells from G<sub>D2</sub>pos and G<sub>D2</sub>neg EwS cell lines.** A. Proliferation of tumor cells from 10 G<sub>D2</sub>pos and 9 G<sub>D2</sub>neg EwS cell lines (defined as in Figure 1A) after 3 days of *in vitro* culture by luminometry. RLU, relative luminescence unit. Statistical analysis by t-test. B. Colony formation of tumor cells from 10 G<sub>D2</sub>pos and 9 G<sub>D2</sub>neg EwS cell lines in semisolid agar. Statistical analysis by t-test. C. Viabilities of tumor cells from 10 G<sub>D2</sub>pos and 9 G<sub>D2</sub>neg EwS cell lines following incubation with the indicated concentrations of doxorubicin by luminometry. Statistical analysis by Rank sum test for all concentrations.

**Supplemental Table 1. Authentication of cell lines.** The identity of the cell lines was confirmed by short tandem repeat (STR) profiling.

\*<http://www.dsmz.de/fp/cgi-bin/str.html>

| Cell line | D3S1358 | vWA   | FGA   | Amelogenin | TH01   | TPOX  | CSF1PO | D5S818 | D13S317 | D16S539 | D7S820 | Cell bank profile available? |                |
|-----------|---------|-------|-------|------------|--------|-------|--------|--------|---------|---------|--------|------------------------------|----------------|
| TC-71     | 15,17   | 17,18 | 24,26 | x,y        | 9.30   | 8,9   | 10,11  | 10     | 11,12   | 11,14   | 10     | Yes                          | 100% Match     |
| MS-EwS-15 | 15,17   | 17,18 | 20,22 | x,y        | 6.00   | 8     | 10,11  | 11     | 14      | 12,13   | 8,11   | No                           | Unique profile |
| MS-EwS-6  | 14      | 16,17 | 20,24 | x,y        | 6.00   | 8     | 10,12  | 13     | 8,13    | 8,11    | 12,13  | No                           | Unique profile |
| MS-EwS-1  | 15,18   | 16,18 | 18,22 | x,y        | 9,9.3  | 11    | 10,11  | 11,12  | 10,11   | 11      | 9,11   | No                           | Unique profile |
| VH-64     | 16,17   | 15,19 | 22,23 | x          | 6      | 8     | 11,12  | 12,13  | 8,11    | 12      | 12     | No                           | Unique profile |
| MS-EwS-34 | 15,18   | 16,18 | 19,23 | x          | 6,8    | 8,10  | 12     | 11     | 9,11    | 12      | 10,12  | No                           | Unique profile |
| MS-EwS-16 | 15,16   | 16,18 | 20,26 | x,y        | 6,7    | 8,10  | 10,11  | 13     | 8,12    | 11      | 8,11   | No                           | Unique profile |
| TC-32     | 15,16   | 15,18 | 23,24 | x          | 6, 9.3 | 9, 11 | 11,13  | 12,13  | 10,12   | 13,14   | 8,11   | No                           | Unique profile |
| A4573     | 16,17   | 18,19 | 24    | x          | 7.80   | 8,10  | 11,13  | 11,12  | 8,10    | 12      | 11     | No                           | Unique profile |
| Cado-ES-1 | 16,18   | 14,18 | 21,22 | x          | 6.90   | 8,11  | 11,12  | 11,12  | 10,13   | 9,11    | 11,13  | Yes                          | 100% Match     |
| SK-ES-1   | 16,18   | 14,17 | 20,21 | x,y        | 6,9.3  | 8     | 11     | 12     | 8,9     | 11      | 10,11  | Yes                          | 100% Match     |
| MS-EwS-4  | 17      | 14,15 | 25    | x,y        | 9.30   | 8     | 12     | 13     | 11      | 11,12   | 10,11  | No                           | Unique profile |
| RD-ES     | 15      | 17    | 21,25 | x,y        | 7.00   | 9,11  | 11     | 11     | 11,12   | 9,11    | 10     | Yes                          | 100% Match     |
| SK-N-MC   | 15      | 17,18 | 21,25 | x          | 9.30   | 9,11  | 10     | 11     | 11      | 12      | 8      | Yes                          | 100% Match     |
| 5838      | 16      | 15,18 | 20,22 | x,y        | 9.30   | 8     | 11     | 10     | 13      | 9,11    | 11     | No                           | Unique profile |
| WE-68     | 15,18   | 16,18 | 19,23 | x          | 6,8    | 8,10  | 12     | 11     | 9,11    | 12      | 10,12  | No                           | Unique profile |
| TTC-466   | 17,18   | 15,17 | 24,25 | x          | 7.00   | 8     | 10     | 10     | 10,12   | 11,12   | 8,10   | No                           | Unique profile |
| A673      | 14      | 15,18 | 19,20 | x          | 9.30   | 8     | 11,12  | 11,12  | 8,13    | 11      | 10,12  | Yes                          | 100% Match     |
| RM-82     | 15,17   | 16    | 18    | x,y        | 7,9.3  | 8     | 12     | 11     | 11,14   | 12      | 8,11   | No                           | Unique profile |
| SupB15    | 15,16   | 15,17 | 19,20 | x,y        | 6,9.3  | 8,9   | 11,12  | 12,13  | 8,14    | 11,12   | 10,11  | Yes                          | 100% Match     |

**Supplemental Table 1. Continued.**

|             |       |       |       |     |       |      |       |       |       |       |      |     |                |
|-------------|-------|-------|-------|-----|-------|------|-------|-------|-------|-------|------|-----|----------------|
| Jurkat      | 15    | 18    | 20,21 | x,y | 6,9.3 | 8,10 | 11,12 | 9     | 8,12  | 11    | 8,12 | Yes | 100% Match     |
| Fibroblasts | 15,17 | 15,19 | 22,26 | x   | 6.00  | 8,9  | 10    | 11,12 | 11,13 | 12,13 | 8,10 | No  | Unique profile |
| A204        | 14,17 | 15,17 | 21    | x   | 8,9.3 | 8,9  | 10,13 | 12    | 11,12 | 11,12 | 8,10 | Yes | 100% Match     |
| LCL         | 14,16 | 17,20 | 23,25 | x   | 6,9   | 8    | 11,12 | 11    | 8,12  | 11,12 | 9,10 | No  | Unique profile |
